# Supplementary material for: FOCUS: an alignment-free model to identify organisms in metagenomes using non-negative least squares
Source: PeerJ. 2014 Jun 5;2:e425. doi: 10.7717/peerj.425 (PMC4060023; doi:10.7717/peerj.425)
Supplement: Table S3 [file peerj-02-425-s003.xlsx]

## Sheet: Supplementary_Table_3
SRS ID	Body Site	Reads file location	Reads MD5	Reads File Size
SRS019215	anterior_nares	ftp://public-ftp.hmpdacc.org/data/Illumina/anterior_nares/SRS019215.tar.bz2	55de248bbfa8c1bbf4447d007330f7ff	10626323
SRS063178	anterior_nares	ftp://public-ftp.hmpdacc.org/data/Illumina/anterior_nares/SRS063178.tar.bz2	336f0b31b92880224c91ad52c4784adc	13701163
SRS065179	anterior_nares	ftp://public-ftp.hmpdacc.org/data/Illumina/anterior_nares/SRS065179.tar.bz2	27b2c9209bc56cbe219d8c65fa32296c	13923530
SRS065142	anterior_nares	ftp://public-ftp.hmpdacc.org/data/Illumina/anterior_nares/SRS065142.tar.bz2	3b05d6fcb205106fbd03f314e39f6d63	14140647
SRS063417	posterior_fornix	ftp://public-ftp.hmpdacc.org/data/Illumina/posterior_fornix/SRS063417.tar.bz2	e2f835c31afbce87700b00ca8e061b49	16646879
SRS018585	anterior_nares	ftp://public-ftp.hmpdacc.org/data/Illumina/anterior_nares/SRS018585.tar.bz2	9d4129d2f5fdd51b9fc899bd84c47b5b	17652230
SRS015640	anterior_nares	ftp://public-ftp.hmpdacc.org/data/Illumina/anterior_nares/SRS015640.tar.bz2	595baf36d8b3dcdd21149b3086ccbbee	18415433
SRS056210	anterior_nares	ftp://public-ftp.hmpdacc.org/data/Illumina/anterior_nares/SRS056210.tar.bz2	9b2f74b8067e6f20551e6d3b48124c42	19021776
SRS018312	anterior_nares	ftp://public-ftp.hmpdacc.org/data/Illumina/anterior_nares/SRS018312.tar.bz2	2454e80d7e5216adf8d5b1850c98738c	19820758
SRS015450	anterior_nares	ftp://public-ftp.hmpdacc.org/data/Illumina/anterior_nares/SRS015450.tar.bz2	eefc0dcf2d52ca5251b01860d54d2bb5	19861830
SRS049744	anterior_nares	ftp://public-ftp.hmpdacc.org/data/Illumina/anterior_nares/SRS049744.tar.bz2	6d9e2ffc82b08ef37551e902096e4c98	22519445
SRS012291	anterior_nares	ftp://public-ftp.hmpdacc.org/data/Illumina/anterior_nares/SRS012291.tar.bz2	12775f5df6e71961f1c544e84f6c7342	22919793
SRS051600	anterior_nares	ftp://public-ftp.hmpdacc.org/data/Illumina/anterior_nares/SRS051600.tar.bz2	391775b95926a221b8a3cde54a79ae22	23235970
SRS044742	posterior_fornix	ftp://public-ftp.hmpdacc.org/data/Illumina/posterior_fornix/SRS044742.tar.bz2	3c92bdb9d8e93ce6fab8d08e3d9ae35f	23342757
SRS019339	anterior_nares	ftp://public-ftp.hmpdacc.org/data/Illumina/anterior_nares/SRS019339.tar.bz2	76a621d6503d11d1a133a023dc240ae5	24213625
SRS017244	anterior_nares	ftp://public-ftp.hmpdacc.org/data/Illumina/anterior_nares/SRS017244.tar.bz2	b7c2dec67738f317cb8826c09e1a9e39	24687838
SRS018671	anterior_nares	ftp://public-ftp.hmpdacc.org/data/Illumina/anterior_nares/SRS018671.tar.bz2	7548b06b37038440c5420f7677ff7371	25173317
SRS022645	anterior_nares	ftp://public-ftp.hmpdacc.org/data/Illumina/anterior_nares/SRS022645.tar.bz2	ce202d8eba5a31a53d2e343c4edb8df7	25266970
SRS016513	anterior_nares	ftp://public-ftp.hmpdacc.org/data/Illumina/anterior_nares/SRS016513.tar.bz2	5a9e6a77146ff6e06e8ecadcc8f36310	25487311
SRS016033	anterior_nares	ftp://public-ftp.hmpdacc.org/data/Illumina/anterior_nares/SRS016033.tar.bz2	fd9a7d1556834b1c19327489b38b21e1	25555143
SRS018369	anterior_nares	ftp://public-ftp.hmpdacc.org/data/Illumina/anterior_nares/SRS018369.tar.bz2	f210fded21962231509c5dfae9497e28	25614289
SRS024567	anterior_nares	ftp://public-ftp.hmpdacc.org/data/Illumina/anterior_nares/SRS024567.tar.bz2	9eccc489c9f8f98170365ba3ba830d47	25654232
SRS013956	anterior_nares	ftp://public-ftp.hmpdacc.org/data/Illumina/anterior_nares/SRS013956.tar.bz2	0bb9840948fc7515caea295ed6397130	26099775
SRS052756	posterior_fornix	ftp://public-ftp.hmpdacc.org/data/Illumina/posterior_fornix/SRS052756.tar.bz2	99d708b3aaa8e998bb8a4c8ae424f2ea	28093376
SRS044626	anterior_nares	ftp://public-ftp.hmpdacc.org/data/Illumina/anterior_nares/SRS044626.tar.bz2	5b77077b6ab697cf50417f755bf5f0d4	28378901
SRS011584	posterior_fornix	ftp://public-ftp.hmpdacc.org/data/Illumina/posterior_fornix/SRS011584.tar.bz2	28fbe41f89ddc598ddedebbe45a63a85	28421624
SRS016581	anterior_nares	ftp://public-ftp.hmpdacc.org/data/Illumina/anterior_nares/SRS016581.tar.bz2	19a44dbe7057ff17eaaccc0957fbed4c	29298648
SRS011263	anterior_nares	ftp://public-ftp.hmpdacc.org/data/Illumina/anterior_nares/SRS011263.tar.bz2	30784966e7148842e5b05068efda2d55	30630950
SRS011132	anterior_nares	ftp://public-ftp.hmpdacc.org/data/Illumina/anterior_nares/SRS011132.tar.bz2	b6602114a83d101d97856f6212d42789	30874163
SRS065133	buccal_mucosa	ftp://public-ftp.hmpdacc.org/data/Illumina/buccal_mucosa/SRS065133.tar.bz2	36fd87eabd1db18df862c7450f796c4f	31424108
SRS015071	vaginal_introitus	ftp://public-ftp.hmpdacc.org/data/Illumina/vaginal_introitus/SRS015071.tar.bz2	2372fa7816fa0e3b39516178791ad148	33916101
SRS018784	anterior_nares	ftp://public-ftp.hmpdacc.org/data/Illumina/anterior_nares/SRS018784.tar.bz2	e061c986c11bfc30735a61a2c23d3183	35267700
SRS016188	anterior_nares	ftp://public-ftp.hmpdacc.org/data/Illumina/anterior_nares/SRS016188.tar.bz2	76423400ce6ef6c2db9cfe0f840c3779	35536436
SRS015430	anterior_nares	ftp://public-ftp.hmpdacc.org/data/Illumina/anterior_nares/SRS015430.tar.bz2	86dbd47ab7007e6515f4b255cf95e1b8	35575892
SRS018463	anterior_nares	ftp://public-ftp.hmpdacc.org/data/Illumina/anterior_nares/SRS018463.tar.bz2	150a3559ceaf98dd8cb99e838c7e22c6	35647099
SRS015051	anterior_nares	ftp://public-ftp.hmpdacc.org/data/Illumina/anterior_nares/SRS015051.tar.bz2	b0f905a539a5b333623921da61e1fac6	36481771
SRS017156	anterior_nares	ftp://public-ftp.hmpdacc.org/data/Illumina/anterior_nares/SRS017156.tar.bz2	26da99039a85dd19c1c77996da7bd0f7	36748149
SRS013269	anterior_nares	ftp://public-ftp.hmpdacc.org/data/Illumina/anterior_nares/SRS013269.tar.bz2	ceaee617a0af699a228987a734def28e	37318665
SRS013155	anterior_nares	ftp://public-ftp.hmpdacc.org/data/Illumina/anterior_nares/SRS013155.tar.bz2	1b667436bfdb2d8060149ef126e4f971	37885237
SRS023970	anterior_nares	ftp://public-ftp.hmpdacc.org/data/Illumina/anterior_nares/SRS023970.tar.bz2	1fbadcd34f0df81bc3a004119ca89868	38143134
SRS013637	anterior_nares	ftp://public-ftp.hmpdacc.org/data/Illumina/anterior_nares/SRS013637.tar.bz2	5acc0e71e5031a4a07fd9c5ccc55bd4e	39696236
SRS065431	buccal_mucosa	ftp://public-ftp.hmpdacc.org/data/Illumina/buccal_mucosa/SRS065431.tar.bz2	7fe2439fc70e34fc3ca41d074ca5ba70	39886438
SRS015269	anterior_nares	ftp://public-ftp.hmpdacc.org/data/Illumina/anterior_nares/SRS015269.tar.bz2	7a56000f9a9306745066f5a2e16f4c3c	40433896
SRS021483	anterior_nares	ftp://public-ftp.hmpdacc.org/data/Illumina/anterior_nares/SRS021483.tar.bz2	73e6f0cf582ac3d0bfe52fca1fe48201	40815560
SRS016111	posterior_fornix	ftp://public-ftp.hmpdacc.org/data/Illumina/posterior_fornix/SRS016111.tar.bz2	697001eaa1dab38debf563b7061a58f9	41372844
SRS015073	posterior_fornix	ftp://public-ftp.hmpdacc.org/data/Illumina/posterior_fornix/SRS015073.tar.bz2	0ae00a03617119572025d796ea85ce0f	41534366
SRS019386	anterior_nares	ftp://public-ftp.hmpdacc.org/data/Illumina/anterior_nares/SRS019386.tar.bz2	29502fb506bce65e2b551291c41ae09c	42299969
SRS016434	anterior_nares	ftp://public-ftp.hmpdacc.org/data/Illumina/anterior_nares/SRS016434.tar.bz2	86e0aaf3e6c83efda080f7e517d97d64	43109906
SRS019067	anterior_nares	ftp://public-ftp.hmpdacc.org/data/Illumina/anterior_nares/SRS019067.tar.bz2	cddfd913de6863862f77d757b8a5313e	43457527
SRS014464	anterior_nares	ftp://public-ftp.hmpdacc.org/data/Illumina/anterior_nares/SRS014464.tar.bz2	abbafcb579f489cfa4d7d81cd91191e4	45166211
SRS022734	posterior_fornix	ftp://public-ftp.hmpdacc.org/data/Illumina/posterior_fornix/SRS022734.tar.bz2	529e5640e1b2b395d77ee460d27805f8	47106850
SRS016553	anterior_nares	ftp://public-ftp.hmpdacc.org/data/Illumina/anterior_nares/SRS016553.tar.bz2	61cb5f833df4c923d52ce6db278d63d2	47497480
SRS017697	anterior_nares	ftp://public-ftp.hmpdacc.org/data/Illumina/anterior_nares/SRS017697.tar.bz2	5ba8b1ef44f587caa3763c76afa73797	48153493
SRS014466	mid_vagina	ftp://public-ftp.hmpdacc.org/data/Illumina/mid_vagina/SRS014466.tar.bz2	5e4a7b783cd03742228646f4299cd46f	49164669
SRS019379	posterior_fornix	ftp://public-ftp.hmpdacc.org/data/Illumina/posterior_fornix/SRS019379.tar.bz2	a8a4a9b8be916d97d16cfec9b7d1b520	49641194
SRS019119	anterior_nares	ftp://public-ftp.hmpdacc.org/data/Illumina/anterior_nares/SRS019119.tar.bz2	eb1e7ee0774e424911deeab5293449a6	51365975
SRS023850	posterior_fornix	ftp://public-ftp.hmpdacc.org/data/Illumina/posterior_fornix/SRS023850.tar.bz2	0ff21ddbd486fb8831950845d90222f9	51505268
SRS019087	anterior_nares	ftp://public-ftp.hmpdacc.org/data/Illumina/anterior_nares/SRS019087.tar.bz2	fc6b8971e6c38991bb4670fafa7d7d19	51585202
SRS052330	posterior_fornix	ftp://public-ftp.hmpdacc.org/data/Illumina/posterior_fornix/SRS052330.tar.bz2	2c7cedd3a9f8ba298f92452d626e899d	53541583
SRS021969	posterior_fornix	ftp://public-ftp.hmpdacc.org/data/Illumina/posterior_fornix/SRS021969.tar.bz2	7ecd1754649f0f9f176ecfe5b34f9d89	54558798
SRS019597	anterior_nares	ftp://public-ftp.hmpdacc.org/data/Illumina/anterior_nares/SRS019597.tar.bz2	60ff893c47fc93a2aff63a4b3d4f0d41	54586552
SRS015793	anterior_nares	ftp://public-ftp.hmpdacc.org/data/Illumina/anterior_nares/SRS015793.tar.bz2	48b72a38332af46183472346c8cf4586	55521914
SRS022092	posterior_fornix	ftp://public-ftp.hmpdacc.org/data/Illumina/posterior_fornix/SRS022092.tar.bz2	a46f9db845d7440f6df2707f32f3d486	56121339
SRS014465	vaginal_introitus	ftp://public-ftp.hmpdacc.org/data/Illumina/vaginal_introitus/SRS014465.tar.bz2	116226db2b45252e2f2448636cb33237	56384470
SRS023534	buccal_mucosa	ftp://public-ftp.hmpdacc.org/data/Illumina/buccal_mucosa/SRS023534.tar.bz2	e796cf9f1693e3a735023d316f48a402	56767428
SRS024064	anterior_nares	ftp://public-ftp.hmpdacc.org/data/Illumina/anterior_nares/SRS024064.tar.bz2	ec385958cc49b687d59bc21788e8e7a7	57024050
SRS062520	posterior_fornix	ftp://public-ftp.hmpdacc.org/data/Illumina/posterior_fornix/SRS062520.tar.bz2	07c54eec215d5dbc6ab4b7c8bb2bfeff	60176638
SRS019867	anterior_nares	ftp://public-ftp.hmpdacc.org/data/Illumina/anterior_nares/SRS019867.tar.bz2	f5d859bcbe9ae88e9196260c8c7846ca	60795841
SRS024301	anterior_nares	ftp://public-ftp.hmpdacc.org/data/Illumina/anterior_nares/SRS024301.tar.bz2	862af5894a70b2982568091e90f32013	63294918
SRS051613	anterior_nares	ftp://public-ftp.hmpdacc.org/data/Illumina/anterior_nares/SRS051613.tar.bz2	bbb25b41df1a88f748789d94eebc2f3a	63601603
SRS020868	anterior_nares	ftp://public-ftp.hmpdacc.org/data/Illumina/anterior_nares/SRS020868.tar.bz2	97e0a29281ea9bba1d7d1984f3dae191	64650187
SRS052620	posterior_fornix	ftp://public-ftp.hmpdacc.org/data/Illumina/posterior_fornix/SRS052620.tar.bz2	eac01361bfe56fa31a3e8b57e47c3048	65642454
SRS018769	posterior_fornix	ftp://public-ftp.hmpdacc.org/data/Illumina/posterior_fornix/SRS018769.tar.bz2	d2736e01302f9a9b8b2335481e01a698	66894690
SRS022158	posterior_fornix	ftp://public-ftp.hmpdacc.org/data/Illumina/posterior_fornix/SRS022158.tar.bz2	0c5e829cbd1f79451c63cf451ac7283b	69622218
SRS015072	mid_vagina	ftp://public-ftp.hmpdacc.org/data/Illumina/mid_vagina/SRS015072.tar.bz2	039f08ba2b6405d8d441a25a73816f06	70285643
SRS015059	buccal_mucosa	ftp://public-ftp.hmpdacc.org/data/Illumina/buccal_mucosa/SRS015059.tar.bz2	9d4dd8f13177dbf6c3e023fd55f08d3d	71631974
SRS049237	posterior_fornix	ftp://public-ftp.hmpdacc.org/data/Illumina/posterior_fornix/SRS049237.tar.bz2	ccc3c6e7f83956f0520f0ec6ac346f94	73388503
SRS012294	posterior_fornix	ftp://public-ftp.hmpdacc.org/data/Illumina/posterior_fornix/SRS012294.tar.bz2	baee3d1f829ff0e967c60ade13027d63	74283395
SRS018981	anterior_nares	ftp://public-ftp.hmpdacc.org/data/Illumina/anterior_nares/SRS018981.tar.bz2	3f0d8f31f4d91df4c96ebd5b8480d3e2	75526388
SRS014494	posterior_fornix	ftp://public-ftp.hmpdacc.org/data/Illumina/posterior_fornix/SRS014494.tar.bz2	93c9ca6a177a4875da90b3362fd89b7e	76611569
SRS063035	anterior_nares	ftp://public-ftp.hmpdacc.org/data/Illumina/anterior_nares/SRS063035.tar.bz2	27c5b786ec26ed707440a60d2c67d54c	76757470
SRS015752	anterior_nares	ftp://public-ftp.hmpdacc.org/data/Illumina/anterior_nares/SRS015752.tar.bz2	7ac2968e0963e8c4b87593f9b72faf89	77260801
SRS014629	posterior_fornix	ftp://public-ftp.hmpdacc.org/data/Illumina/posterior_fornix/SRS014629.tar.bz2	5059023190e6561ea6ce713c8688316b	78035221
SRS017451	anterior_nares	ftp://public-ftp.hmpdacc.org/data/Illumina/anterior_nares/SRS017451.tar.bz2	9fa59ed275cf19d36568bc19dfc659bb	78565926
SRS022129	anterior_nares	ftp://public-ftp.hmpdacc.org/data/Illumina/anterior_nares/SRS022129.tar.bz2	99fdcc156f7e647f943475adeb7aba66	79658511
SRS016516	posterior_fornix	ftp://public-ftp.hmpdacc.org/data/Illumina/posterior_fornix/SRS016516.tar.bz2	64f926a939b2bb8ec1b2354b2bb819d6	80023964
SRS019600	posterior_fornix	ftp://public-ftp.hmpdacc.org/data/Illumina/posterior_fornix/SRS019600.tar.bz2	f3be706eb7bf0a534dcd5ccd863a9882	82607177
SRS016292	anterior_nares	ftp://public-ftp.hmpdacc.org/data/Illumina/anterior_nares/SRS016292.tar.bz2	5d9905f6c8516e0862078759db2e2d3f	85435039
SRS051505	posterior_fornix	ftp://public-ftp.hmpdacc.org/data/Illumina/posterior_fornix/SRS051505.tar.bz2	10c6810ddadd1817fd3c11d3d2e6370e	85531389
SRS016752	anterior_nares	ftp://public-ftp.hmpdacc.org/data/Illumina/anterior_nares/SRS016752.tar.bz2	50434f01bc60ee1b9298bcf2dad6c791	85943169
SRS012281	buccal_mucosa	ftp://public-ftp.hmpdacc.org/data/Illumina/buccal_mucosa/SRS012281.tar.bz2	e441c4a012883500150342e90aefdf5c	87026816
SRS050184	posterior_fornix	ftp://public-ftp.hmpdacc.org/data/Illumina/posterior_fornix/SRS050184.tar.bz2	ae13118083b5fb8e1b45a82680b7c90e	87627427
SRS017044	anterior_nares	ftp://public-ftp.hmpdacc.org/data/Illumina/anterior_nares/SRS017044.tar.bz2	28eee9f17d9d34a91eb57c470eb89cda	91197174
SRS015225	posterior_fornix	ftp://public-ftp.hmpdacc.org/data/Illumina/posterior_fornix/SRS015225.tar.bz2	1bb0d1d9633c6d6a9ada289b92780524	92034287
SRS017520	posterior_fornix	ftp://public-ftp.hmpdacc.org/data/Illumina/posterior_fornix/SRS017520.tar.bz2	7006c252fa10233c53eef657f6a923f4	92434230
SRS077751	posterior_fornix	ftp://public-ftp.hmpdacc.org/data/Illumina/posterior_fornix/SRS077751.tar.bz2	bbec29dc15f17fe995493f5eaeb08b15	95502062
SRS017820	anterior_nares	ftp://public-ftp.hmpdacc.org/data/Illumina/anterior_nares/SRS017820.tar.bz2	fed639f4984b65d36120a500dba9dea8	96023193
SRS050025	anterior_nares	ftp://public-ftp.hmpdacc.org/data/Illumina/anterior_nares/SRS050025.tar.bz2	ed37f14c4e38b3b40cb960ef1852e208	96553646
SRS016088	buccal_mucosa	ftp://public-ftp.hmpdacc.org/data/Illumina/buccal_mucosa/SRS016088.tar.bz2	adbdc5b00803c204ca749cc5b83d17df	97144961
SRS014475	throat	ftp://public-ftp.hmpdacc.org/data/Illumina/throat/SRS014475.tar.bz2	dd85ff79c0d7e6710e39a77810bfc7a7	99527955
SRS050007	buccal_mucosa	ftp://public-ftp.hmpdacc.org/data/Illumina/buccal_mucosa/SRS050007.tar.bz2	c6b5fbb727816e1d35bc96a3db66aa61	103287267
SRS062713	anterior_nares	ftp://public-ftp.hmpdacc.org/data/Illumina/anterior_nares/SRS062713.tar.bz2	b20ab15ba8a2cd911eaa858e1d460d9e	105015419
SRS012663	anterior_nares	ftp://public-ftp.hmpdacc.org/data/Illumina/anterior_nares/SRS012663.tar.bz2	ce5e83e17d85cdcd9325fcb7deed87b1	105667144
SRS049283	buccal_mucosa	ftp://public-ftp.hmpdacc.org/data/Illumina/buccal_mucosa/SRS049283.tar.bz2	ac3c9a23c56c5186d8260537129277da	109443259
SRS019039	anterior_nares	ftp://public-ftp.hmpdacc.org/data/Illumina/anterior_nares/SRS019039.tar.bz2	b1c5475b63bc694a116e6da88105385c	113283010
SRS020232	anterior_nares	ftp://public-ftp.hmpdacc.org/data/Illumina/anterior_nares/SRS020232.tar.bz2	7cca5dd5cd1190a80d1e9bed25bdad4d	113838168
SRS024068	posterior_fornix	ftp://public-ftp.hmpdacc.org/data/Illumina/posterior_fornix/SRS024068.tar.bz2	4edbf627ff498bdc670466dd1c90d0f1	116317194
SRS016559	posterior_fornix	ftp://public-ftp.hmpdacc.org/data/Illumina/posterior_fornix/SRS016559.tar.bz2	ad768eee242c70b5871905c2930b60c8	117178244
SRS015062	throat	ftp://public-ftp.hmpdacc.org/data/Illumina/throat/SRS015062.tar.bz2	96c455225ea351fccf24de181e74abe5	117648278
SRS024428	posterior_fornix	ftp://public-ftp.hmpdacc.org/data/Illumina/posterior_fornix/SRS024428.tar.bz2	54115fb50dc5945e54ec7e8614b21924	120064567
SRS042428	posterior_fornix	ftp://public-ftp.hmpdacc.org/data/Illumina/posterior_fornix/SRS042428.tar.bz2	184732444f4b61f6d2bb8869e8d0998e	121168606
SRS053437	anterior_nares	ftp://public-ftp.hmpdacc.org/data/Illumina/anterior_nares/SRS053437.tar.bz2	6b8ace391b7797a97fc6b04bb949fdbf	127011157
SRS064704	posterior_fornix	ftp://public-ftp.hmpdacc.org/data/Illumina/posterior_fornix/SRS064704.tar.bz2	308533e2d78dd745d307ca6866fd56a5	133326453
SRS054061	anterior_nares	ftp://public-ftp.hmpdacc.org/data/Illumina/anterior_nares/SRS054061.tar.bz2	e0ff183c71025268abc1ef99bee10ac9	138711242
SRS055298	posterior_fornix	ftp://public-ftp.hmpdacc.org/data/Illumina/posterior_fornix/SRS055298.tar.bz2	8ce924511b33bb08db25c623868cdd14	142496941
SRS019019	anterior_nares	ftp://public-ftp.hmpdacc.org/data/Illumina/anterior_nares/SRS019019.tar.bz2	702dc4439b7039f211f03984e484f292	152954704
SRS014890	buccal_mucosa	ftp://public-ftp.hmpdacc.org/data/Illumina/buccal_mucosa/SRS014890.tar.bz2	16e3de6268788bd2753ad3d01d221d73	157995771
SRS054962	posterior_fornix	ftp://public-ftp.hmpdacc.org/data/Illumina/posterior_fornix/SRS054962.tar.bz2	432e5a7fa36c0d4bd94d371e47c24a9f	162822972
SRS020336	buccal_mucosa	ftp://public-ftp.hmpdacc.org/data/Illumina/buccal_mucosa/SRS020336.tar.bz2	23753ef8187bca3681ec961d5b50c0aa	163988459
SRS011397	anterior_nares	ftp://public-ftp.hmpdacc.org/data/Illumina/anterior_nares/SRS011397.tar.bz2	e84aab4c2e80dccd0d50d0aa3dda17d3	164504217
SRS014901	anterior_nares	ftp://public-ftp.hmpdacc.org/data/Illumina/anterior_nares/SRS014901.tar.bz2	7d0b7d4e22778141c9bd149e844efc4e	169551612
SRS046344	anterior_nares	ftp://public-ftp.hmpdacc.org/data/Illumina/anterior_nares/SRS046344.tar.bz2	f8fee0fd797781a49197aff1afc540e2	173219153
SRS013876	anterior_nares	ftp://public-ftp.hmpdacc.org/data/Illumina/anterior_nares/SRS013876.tar.bz2	153c8fe0950c40c086bd58ab59e72329	177409068
SRS014472	buccal_mucosa	ftp://public-ftp.hmpdacc.org/data/Illumina/buccal_mucosa/SRS014472.tar.bz2	82559820fcaec607dd104ff755424a30	181856675
SRS019033	right_retroauricular_crease	ftp://public-ftp.hmpdacc.org/data/Illumina/right_retroauricular_crease/SRS019033.tar.bz2	eedd1c1025db27cc3fda42a94ca63f29	189774723
SRS015168	posterior_fornix	ftp://public-ftp.hmpdacc.org/data/Illumina/posterior_fornix/SRS015168.tar.bz2	b015147e2d905ddb07a41ccb8346e51c	192962347
SRS056695	posterior_fornix	ftp://public-ftp.hmpdacc.org/data/Illumina/posterior_fornix/SRS056695.tar.bz2	adb04ee43bd519f199e7c40cf2d76b03	194860332
SRS020349	posterior_fornix	ftp://public-ftp.hmpdacc.org/data/Illumina/posterior_fornix/SRS020349.tar.bz2	f2e52704cafe6d78a2444cddcabd7b6e	200854178
SRS023591	buccal_mucosa	ftp://public-ftp.hmpdacc.org/data/Illumina/buccal_mucosa/SRS023591.tar.bz2	2e6eb66cd3e4a22fe8988d6d546f8886	201531253
SRS015937	anterior_nares	ftp://public-ftp.hmpdacc.org/data/Illumina/anterior_nares/SRS015937.tar.bz2	da19867b56dd5d2e75bfa3a719e94418	202878197
SRS063478	buccal_mucosa	ftp://public-ftp.hmpdacc.org/data/Illumina/buccal_mucosa/SRS063478.tar.bz2	9d1d5437b066bc6dad957c754697e674	204563138
SRS016297	buccal_mucosa	ftp://public-ftp.hmpdacc.org/data/Illumina/buccal_mucosa/SRS016297.tar.bz2	7abbffe4a136575dabaf3e0fb5451532	204867797
SRS058213	anterior_nares	ftp://public-ftp.hmpdacc.org/data/Illumina/anterior_nares/SRS058213.tar.bz2	8aeb6b833632607b666376e655144f4d	205940081
SRS019872	buccal_mucosa	ftp://public-ftp.hmpdacc.org/data/Illumina/buccal_mucosa/SRS019872.tar.bz2	2fb9c3977fc54a00bbbd3eac64344d42	207953983
SRS013542	posterior_fornix	ftp://public-ftp.hmpdacc.org/data/Illumina/posterior_fornix/SRS013542.tar.bz2	9e78cc15b2540746f3051fab46eed42e	210996818
SRS015274	buccal_mucosa	ftp://public-ftp.hmpdacc.org/data/Illumina/buccal_mucosa/SRS015274.tar.bz2	7c768f2a2d5e12050599904301fa4acd	211648279
SRS047844	anterior_nares	ftp://public-ftp.hmpdacc.org/data/Illumina/anterior_nares/SRS047844.tar.bz2	4de90f78170bebdca2a4cb674a81316a	212825997
SRS065347	posterior_fornix	ftp://public-ftp.hmpdacc.org/data/Illumina/posterior_fornix/SRS065347.tar.bz2	107f4a7575a8209f28bada8e985b37da	217562409
SRS019221	buccal_mucosa	ftp://public-ftp.hmpdacc.org/data/Illumina/buccal_mucosa/SRS019221.tar.bz2	be262cbe24f68ab95177d4667fec903e	218664828
SRS052590	anterior_nares	ftp://public-ftp.hmpdacc.org/data/Illumina/anterior_nares/SRS052590.tar.bz2	93173e6051ad9c379b17a49a1b62f1fe	219829246
SRS019986	anterior_nares	ftp://public-ftp.hmpdacc.org/data/Illumina/anterior_nares/SRS019986.tar.bz2	701ecd9a9a85ca02fdc0041c49aadfce	220157879
SRS014575	buccal_mucosa	ftp://public-ftp.hmpdacc.org/data/Illumina/buccal_mucosa/SRS014575.tar.bz2	174718398d6d5408e8a3652e4a35437a	223042185
SRS019024	buccal_mucosa	ftp://public-ftp.hmpdacc.org/data/Illumina/buccal_mucosa/SRS019024.tar.bz2	788ed7d032ee433663ba309cbcb60801	224976290
SRS042858	posterior_fornix	ftp://public-ftp.hmpdacc.org/data/Illumina/posterior_fornix/SRS042858.tar.bz2	e6e9b65a1fe04da0f074b814502ce1a6	226854563
SRS047225	anterior_nares	ftp://public-ftp.hmpdacc.org/data/Illumina/anterior_nares/SRS047225.tar.bz2	fe256fc2b85f1a1ee219a5aaff16eb09	228536579
SRS024620	left_retroauricular_crease	ftp://public-ftp.hmpdacc.org/data/Illumina/left_retroauricular_crease/SRS024620.tar.bz2	a286cdc62000286673efaf67b5c72266	231203167
SRS011144	buccal_mucosa	ftp://public-ftp.hmpdacc.org/data/Illumina/buccal_mucosa/SRS011144.tar.bz2	ae781cf1419a6b9b87db3c711b0307f7	233426692
SRS064376	posterior_fornix	ftp://public-ftp.hmpdacc.org/data/Illumina/posterior_fornix/SRS064376.tar.bz2	da3023775be6f6c27cb08b61d6eae751	237705847
SRS044474	anterior_nares	ftp://public-ftp.hmpdacc.org/data/Illumina/anterior_nares/SRS044474.tar.bz2	0b60b8702094797f7448a15eb10deffa	241202975
SRS020386	anterior_nares	ftp://public-ftp.hmpdacc.org/data/Illumina/anterior_nares/SRS020386.tar.bz2	82bb9ccde1ce03878f6cafe13bd61389	251423053
SRS014474	palatine_tonsils	ftp://public-ftp.hmpdacc.org/data/Illumina/palatine_tonsils/SRS014474.tar.bz2	2e12e7fc5250d4626f276cd71ee3aff5	257104096
SRS023354	buccal_mucosa	ftp://public-ftp.hmpdacc.org/data/Illumina/buccal_mucosa/SRS023354.tar.bz2	2dcaef6fec0e0c04941ffdd44828b969	260051081
SRS019391	buccal_mucosa	ftp://public-ftp.hmpdacc.org/data/Illumina/buccal_mucosa/SRS019391.tar.bz2	499429546ed42ffa67bc8e8bb708474c	263891253
SRS016944	left_retroauricular_crease	ftp://public-ftp.hmpdacc.org/data/Illumina/left_retroauricular_crease/SRS016944.tar.bz2	225af4d878d9a3c8d2a0f2a20be4243a	270781891
SRS015061	palatine_tonsils	ftp://public-ftp.hmpdacc.org/data/Illumina/palatine_tonsils/SRS015061.tar.bz2	8cf0c547f6113328b8871d9595801c52	272327125
SRS024557	buccal_mucosa	ftp://public-ftp.hmpdacc.org/data/Illumina/buccal_mucosa/SRS024557.tar.bz2	0f6a4ffd33702d25d6ce85f71971b989	275426207
SRS011090	buccal_mucosa	ftp://public-ftp.hmpdacc.org/data/Illumina/buccal_mucosa/SRS011090.tar.bz2	7f9eebcb529e830f7db78a520ac947d9	275812894
SRS022721	buccal_mucosa	ftp://public-ftp.hmpdacc.org/data/Illumina/buccal_mucosa/SRS022721.tar.bz2	33ce775c1579a4b59aaadc1775e90444	276573920
SRS019989	posterior_fornix	ftp://public-ftp.hmpdacc.org/data/Illumina/posterior_fornix/SRS019989.tar.bz2	1d7c116cd60460236d7bc823e11e93de	277723533
SRS062752	vaginal_introitus	ftp://public-ftp.hmpdacc.org/data/Illumina/vaginal_introitus/SRS062752.tar.bz2	126170cc9ada0f37b3d288bcc364b26a	279519831
SRS022079	buccal_mucosa	ftp://public-ftp.hmpdacc.org/data/Illumina/buccal_mucosa/SRS022079.tar.bz2	4e21f1a85745a317ca09723a198ffadd	281148547
SRS023837	buccal_mucosa	ftp://public-ftp.hmpdacc.org/data/Illumina/buccal_mucosa/SRS023837.tar.bz2	f734f72f6757c962aae2900afae78cee	284779410
SRS077738	buccal_mucosa	ftp://public-ftp.hmpdacc.org/data/Illumina/buccal_mucosa/SRS077738.tar.bz2	27a41fc805b99b553b4556fc09c79944	289524370
SRS043646	buccal_mucosa	ftp://public-ftp.hmpdacc.org/data/Illumina/buccal_mucosa/SRS043646.tar.bz2	18dfb30d30cba2a1516f410ddae7c791	294821450
SRS024424	anterior_nares	ftp://public-ftp.hmpdacc.org/data/Illumina/anterior_nares/SRS024424.tar.bz2	552427d1ac2cdbe5202a8b5547f5b4f1	310843441
SRS063351	palatine_tonsils	ftp://public-ftp.hmpdacc.org/data/Illumina/palatine_tonsils/SRS063351.tar.bz2	0f51c36ffec8a38aafbf2e6c208557f1	315629571
SRS016503	buccal_mucosa	ftp://public-ftp.hmpdacc.org/data/Illumina/buccal_mucosa/SRS016503.tar.bz2	762712f179c9b37762a41081f3856fb0	326604838
SRS018661	buccal_mucosa	ftp://public-ftp.hmpdacc.org/data/Illumina/buccal_mucosa/SRS018661.tar.bz2	d1235d450f1beaac1b26e3083a4b0e0e	343365315
SRS022006	anterior_nares	ftp://public-ftp.hmpdacc.org/data/Illumina/anterior_nares/SRS022006.tar.bz2	ceefbd37f300e4dc492a0bdde2011284	343943636
SRS051116	buccal_mucosa	ftp://public-ftp.hmpdacc.org/data/Illumina/buccal_mucosa/SRS051116.tar.bz2	daa356067ddd5d49153dafdca3c7351a	349640001
SRS016349	buccal_mucosa	ftp://public-ftp.hmpdacc.org/data/Illumina/buccal_mucosa/SRS016349.tar.bz2	4ebfbed79a264eca6dc01d87e4108002	360385642
SRS042457	buccal_mucosa	ftp://public-ftp.hmpdacc.org/data/Illumina/buccal_mucosa/SRS042457.tar.bz2	790d61cebb4423983e719bc28c680fe7	361308881
SRS015996	anterior_nares	ftp://public-ftp.hmpdacc.org/data/Illumina/anterior_nares/SRS015996.tar.bz2	a70c227876fe5955fe1fdab9b136d2c1	365463394
SRS014682	anterior_nares	ftp://public-ftp.hmpdacc.org/data/Illumina/anterior_nares/SRS014682.tar.bz2	c5a22d2d16cd5d536eaa2fa340d31b53	382236711
SRS015425	posterior_fornix	ftp://public-ftp.hmpdacc.org/data/Illumina/posterior_fornix/SRS015425.tar.bz2	0fbedd414cafa51997480f93534e31a9	386258813
SRS011269	posterior_fornix	ftp://public-ftp.hmpdacc.org/data/Illumina/posterior_fornix/SRS011269.tar.bz2	e7d80f24568cb696109504bb295a59ef	387030460
SRS019015	left_retroauricular_crease	ftp://public-ftp.hmpdacc.org/data/Illumina/left_retroauricular_crease/SRS019015.tar.bz2	a3c1348de933d8b9c017d416d48be2ea	388850339
SRS015374	buccal_mucosa	ftp://public-ftp.hmpdacc.org/data/Illumina/buccal_mucosa/SRS015374.tar.bz2	0bce6a4a597c55ae867033fa7f617116	394412321
SRS057807	posterior_fornix	ftp://public-ftp.hmpdacc.org/data/Illumina/posterior_fornix/SRS057807.tar.bz2	efbdd32d40016b0d7bc66fe97adf7c7e	412788470
SRS046623	buccal_mucosa	ftp://public-ftp.hmpdacc.org/data/Illumina/buccal_mucosa/SRS046623.tar.bz2	82efb6cf0b96a8e21fc816e2c2bfa6e8	422161568
SRS015054	posterior_fornix	ftp://public-ftp.hmpdacc.org/data/Illumina/posterior_fornix/SRS015054.tar.bz2	42bc0f76c8f9926f8b6fd5c5b4e3fff3	422439156
SRS045254	buccal_mucosa	ftp://public-ftp.hmpdacc.org/data/Illumina/buccal_mucosa/SRS045254.tar.bz2	617e4cab50b9c2adf53c764d1a14c40c	424550621
SRS017537	buccal_mucosa	ftp://public-ftp.hmpdacc.org/data/Illumina/buccal_mucosa/SRS017537.tar.bz2	8b5a9510995631f8ae6ec9411fa3fbe1	428783521
SRS016196	buccal_mucosa	ftp://public-ftp.hmpdacc.org/data/Illumina/buccal_mucosa/SRS016196.tar.bz2	3e9466c06b68459ddd1b94e646cf203e	433756489
SRS014686	buccal_mucosa	ftp://public-ftp.hmpdacc.org/data/Illumina/buccal_mucosa/SRS014686.tar.bz2	6fb82bf74647224e940641b945a8ac84	438999628
SRS019063	left_retroauricular_crease	ftp://public-ftp.hmpdacc.org/data/Illumina/left_retroauricular_crease/SRS019063.tar.bz2	de7fb60a1680c08aba666f1cfe6d5f39	443518114
SRS022532	buccal_mucosa	ftp://public-ftp.hmpdacc.org/data/Illumina/buccal_mucosa/SRS022532.tar.bz2	ebad3a9d8e582ad66e80cf8f37c77eea	444067967
SRS057083	right_retroauricular_crease	ftp://public-ftp.hmpdacc.org/data/Illumina/right_retroauricular_crease/SRS057083.tar.bz2	6e43d367e231f446a75e23d89fea07c0	449760024
SRS055118	buccal_mucosa	ftp://public-ftp.hmpdacc.org/data/Illumina/buccal_mucosa/SRS055118.tar.bz2	683f91778b63355fad1f7f093d989467	457236910
SRS050484	anterior_nares	ftp://public-ftp.hmpdacc.org/data/Illumina/anterior_nares/SRS050484.tar.bz2	4bb769aab6b4e008ae621fa8532210c4	467527955
SRS065335	throat	ftp://public-ftp.hmpdacc.org/data/Illumina/throat/SRS065335.tar.bz2	886d67b985db91c75c6219e3135d8b15	479710867
SRS063272	buccal_mucosa	ftp://public-ftp.hmpdacc.org/data/Illumina/buccal_mucosa/SRS063272.tar.bz2	f2d6a1e84230294eb1e974fb484511e2	480903764
SRS048719	buccal_mucosa	ftp://public-ftp.hmpdacc.org/data/Illumina/buccal_mucosa/SRS048719.tar.bz2	f4bbd30608d09c5925e9b412c8af6379	482110459
SRS023847	anterior_nares	ftp://public-ftp.hmpdacc.org/data/Illumina/anterior_nares/SRS023847.tar.bz2	2f31a00251ad05574b560ead5d7ac951	484888188
SRS015154	buccal_mucosa	ftp://public-ftp.hmpdacc.org/data/Illumina/buccal_mucosa/SRS015154.tar.bz2	c34d29fd263d4b35bbb739c7a006b7d1	486127009
SRS016533	buccal_mucosa	ftp://public-ftp.hmpdacc.org/data/Illumina/buccal_mucosa/SRS016533.tar.bz2	82f0837e9f60dc2e7f03278d0c5346a3	487607069
SRS019116	right_retroauricular_crease	ftp://public-ftp.hmpdacc.org/data/Illumina/right_retroauricular_crease/SRS019116.tar.bz2	2508f17cdce2290ae44268bc56a6c0da	493711073
SRS016191	posterior_fornix	ftp://public-ftp.hmpdacc.org/data/Illumina/posterior_fornix/SRS016191.tar.bz2	d25de6c5a2f6a6fe1c42e15dac4a86af	503082504
SRS015921	buccal_mucosa	ftp://public-ftp.hmpdacc.org/data/Illumina/buccal_mucosa/SRS015921.tar.bz2	6bbd3e78dac88e6b1a9ab3d40e31ff17	506019241
SRS047335	posterior_fornix	ftp://public-ftp.hmpdacc.org/data/Illumina/posterior_fornix/SRS047335.tar.bz2	16420b8713d694c202fdfc1aeb2d7aa4	508063252
SRS015895	buccal_mucosa	ftp://public-ftp.hmpdacc.org/data/Illumina/buccal_mucosa/SRS015895.tar.bz2	666488fdaf36816822d1d950b49b9f6b	539236940
SRS019025	attached_keratinized_gingiva	ftp://public-ftp.hmpdacc.org/data/Illumina/attached_keratinized_gingiva/SRS019025.tar.bz2	78c202438e8729197f6b1d76981f231d	540733508
SRS019976	buccal_mucosa	ftp://public-ftp.hmpdacc.org/data/Illumina/buccal_mucosa/SRS019976.tar.bz2	21a3d9c950dc233ff57ec5b828e29a62	555116795
SRS013942	saliva	ftp://public-ftp.hmpdacc.org/data/Illumina/saliva/SRS013942.tar.bz2	11cb282fd2bd3235963a0ec404385aee	562432852
SRS013825	buccal_mucosa	ftp://public-ftp.hmpdacc.org/data/Illumina/buccal_mucosa/SRS013825.tar.bz2	b56b3f5e6041b6e5c29c5b878ad4b990	563436760
SRS019329	buccal_mucosa	ftp://public-ftp.hmpdacc.org/data/Illumina/buccal_mucosa/SRS019329.tar.bz2	ab9ba71cd9f0564f2044a83e946f2f44	566633476
SRS019120	saliva	ftp://public-ftp.hmpdacc.org/data/Illumina/saliva/SRS019120.tar.bz2	c884c9135361f2ae41db336df63f5e09	567445993
SRS019081	right_retroauricular_crease	ftp://public-ftp.hmpdacc.org/data/Illumina/right_retroauricular_crease/SRS019081.tar.bz2	96c25fa0b7f616f3f0980c9ef709d07a	577652440
SRS015055	saliva	ftp://public-ftp.hmpdacc.org/data/Illumina/saliva/SRS015055.tar.bz2	2841467ebbbff274c20d7caa931faaa2	597489127
SRS017687	buccal_mucosa	ftp://public-ftp.hmpdacc.org/data/Illumina/buccal_mucosa/SRS017687.tar.bz2	374a83803b64bcc7e30843c8329425ac	614938324
SRS045978	buccal_mucosa	ftp://public-ftp.hmpdacc.org/data/Illumina/buccal_mucosa/SRS045978.tar.bz2	edb10556664f1457157d80ab85bbe4fa	616878910
SRS024470	buccal_mucosa	ftp://public-ftp.hmpdacc.org/data/Illumina/buccal_mucosa/SRS024470.tar.bz2	51ba1e467d3039c9aedba8ece28cb601	658229477
SRS013881	buccal_mucosa	ftp://public-ftp.hmpdacc.org/data/Illumina/buccal_mucosa/SRS013881.tar.bz2	0be0baa5f4074ea1885b53ec1ed99b7f	666575143
SRS016039	buccal_mucosa	ftp://public-ftp.hmpdacc.org/data/Illumina/buccal_mucosa/SRS016039.tar.bz2	13052a10599982d3a595030eda9ef0c2	672006614
SRS017497	posterior_fornix	ftp://public-ftp.hmpdacc.org/data/Illumina/posterior_fornix/SRS017497.tar.bz2	39892adc0c54c26bb30a2dec142cf329	680476238
SRS011355	posterior_fornix	ftp://public-ftp.hmpdacc.org/data/Illumina/posterior_fornix/SRS011355.tar.bz2	c4dc2da9a02334e85796e1262e0d4045	687350435
SRS024377	buccal_mucosa	ftp://public-ftp.hmpdacc.org/data/Illumina/buccal_mucosa/SRS024377.tar.bz2	6a37bdaa00b1806ac7322ea61e399d12	695972307
SRS075406	buccal_mucosa	ftp://public-ftp.hmpdacc.org/data/Illumina/buccal_mucosa/SRS075406.tar.bz2	9a0e2eae3cc7e5f8f39cd08960bca612	698311168
SRS021473	buccal_mucosa	ftp://public-ftp.hmpdacc.org/data/Illumina/buccal_mucosa/SRS021473.tar.bz2	5d8fda2604c33f8f7a8484bbb0212bab	700055329
SRS015040	buccal_mucosa	ftp://public-ftp.hmpdacc.org/data/Illumina/buccal_mucosa/SRS015040.tar.bz2	791ce399ab1a51ff26b917f82bce5214	702387979
SRS014107	subgingival_plaque	ftp://public-ftp.hmpdacc.org/data/Illumina/subgingival_plaque/SRS014107.tar.bz2	4ded38a52bb60045b39636af2d64e00a	711858347
SRS015745	buccal_mucosa	ftp://public-ftp.hmpdacc.org/data/Illumina/buccal_mucosa/SRS015745.tar.bz2	e96b33f32ba734e0d87f54e45cc3ccd6	720502100
SRS064809	buccal_mucosa	ftp://public-ftp.hmpdacc.org/data/Illumina/buccal_mucosa/SRS064809.tar.bz2	7904d3e2e39d938157642c3349492735	728838507
SRS017080	buccal_mucosa	ftp://public-ftp.hmpdacc.org/data/Illumina/buccal_mucosa/SRS017080.tar.bz2	638ae91f6df1359f102c45bd80686891	730883727
SRS017441	buccal_mucosa	ftp://public-ftp.hmpdacc.org/data/Illumina/buccal_mucosa/SRS017441.tar.bz2	347faf375c82437303473599b9dddb7b	736462935
SRS018978	right_retroauricular_crease	ftp://public-ftp.hmpdacc.org/data/Illumina/right_retroauricular_crease/SRS018978.tar.bz2	3a5609c68f458658bf4ee4e9cc7d155d	738526173
SRS017810	buccal_mucosa	ftp://public-ftp.hmpdacc.org/data/Illumina/buccal_mucosa/SRS017810.tar.bz2	1212c9980028c660bd876e248c532525	749983286
SRS013711	buccal_mucosa	ftp://public-ftp.hmpdacc.org/data/Illumina/buccal_mucosa/SRS013711.tar.bz2	553efd9c091aca753a5da9162eae7673	751634275
SRS024655	right_retroauricular_crease	ftp://public-ftp.hmpdacc.org/data/Illumina/right_retroauricular_crease/SRS024655.tar.bz2	b86727154990539ec164a6ca4d8a72ff	770084635
SRS054776	buccal_mucosa	ftp://public-ftp.hmpdacc.org/data/Illumina/buccal_mucosa/SRS054776.tar.bz2	1a8ea04bf712c92688d060f2bea8ef3b	776881191
SRS014477	subgingival_plaque	ftp://public-ftp.hmpdacc.org/data/Illumina/subgingival_plaque/SRS014477.tar.bz2	70224e789b976a5c8666b8638608d11e	782338546
SRS019016	right_retroauricular_crease	ftp://public-ftp.hmpdacc.org/data/Illumina/right_retroauricular_crease/SRS019016.tar.bz2	17880e9921e458e5f858d50aa52f4708	785264307
SRS018971	buccal_mucosa	ftp://public-ftp.hmpdacc.org/data/Illumina/buccal_mucosa/SRS018971.tar.bz2	d7dd5bb354ac8d6c0ca801e07c9b112c	786290980
SRS064493	supragingival_plaque	ftp://public-ftp.hmpdacc.org/data/Illumina/supragingival_plaque/SRS064493.tar.bz2	59be8b335520442981ee6da88ae5a900	790451334
SRS024140	buccal_mucosa	ftp://public-ftp.hmpdacc.org/data/Illumina/buccal_mucosa/SRS024140.tar.bz2	19ca81fab81d34f5f565f4cf81d4be6a	815819851
SRS024347	buccal_mucosa	ftp://public-ftp.hmpdacc.org/data/Illumina/buccal_mucosa/SRS024347.tar.bz2	971c25ce7459bc811932d3b5438d4e2a	820122950
SRS045049	buccal_mucosa	ftp://public-ftp.hmpdacc.org/data/Illumina/buccal_mucosa/SRS045049.tar.bz2	ca73a5e8cadefaaa33b63d9ed03225a0	834366498
SRS016600	buccal_mucosa	ftp://public-ftp.hmpdacc.org/data/Illumina/buccal_mucosa/SRS016600.tar.bz2	8d2d78e858527b1139776b2519d0aa5f	868467112
SRS014126	buccal_mucosa	ftp://public-ftp.hmpdacc.org/data/Illumina/buccal_mucosa/SRS014126.tar.bz2	78e36dd3b149af2bd764bf65c02d2528	887285562
SRS013239	buccal_mucosa	ftp://public-ftp.hmpdacc.org/data/Illumina/buccal_mucosa/SRS013239.tar.bz2	5b5cae3791f8b5bd518b6a2b0ac35352	896066089
SRS052668	buccal_mucosa	ftp://public-ftp.hmpdacc.org/data/Illumina/buccal_mucosa/SRS052668.tar.bz2	b1038596904f5afb248e522237276a1b	909310851
SRS024017	buccal_mucosa	ftp://public-ftp.hmpdacc.org/data/Illumina/buccal_mucosa/SRS024017.tar.bz2	17e033c1eca98d39d0bc9a745bd44a33	930067873
SRS020858	buccal_mucosa	ftp://public-ftp.hmpdacc.org/data/Illumina/buccal_mucosa/SRS020858.tar.bz2	86a970b2c854b706ccadcbf38df0e9fe	957060483
SRS015799	buccal_mucosa	ftp://public-ftp.hmpdacc.org/data/Illumina/buccal_mucosa/SRS015799.tar.bz2	54201a11fb25cd05a118a5b63be8983f	969863949
SRS065310	supragingival_plaque	ftp://public-ftp.hmpdacc.org/data/Illumina/supragingival_plaque/SRS065310.tar.bz2	bf8f8540f184da32b3578f3602711dac	984900093
SRS047265	supragingival_plaque	ftp://public-ftp.hmpdacc.org/data/Illumina/supragingival_plaque/SRS047265.tar.bz2	70c93af4ba3abdff8c77807fa5c76111	985502690
SRS022145	buccal_mucosa	ftp://public-ftp.hmpdacc.org/data/Illumina/buccal_mucosa/SRS022145.tar.bz2	5f21cc15c5ad01fc2172be91a74d4f89	1004091323
SRS017700	posterior_fornix	ftp://public-ftp.hmpdacc.org/data/Illumina/posterior_fornix/SRS017700.tar.bz2	f7d27d1b34fac345f4fffd57ee8d406b	1010113435
SRS024482	left_retroauricular_crease	ftp://public-ftp.hmpdacc.org/data/Illumina/left_retroauricular_crease/SRS024482.tar.bz2	cd4ee71a7af859dba4dfe43bbd573e2c	1029044039
SRS057022	buccal_mucosa	ftp://public-ftp.hmpdacc.org/data/Illumina/buccal_mucosa/SRS057022.tar.bz2	f5191810aabdb854e544501bd2146d3d	1060322977
SRS018359	buccal_mucosa	ftp://public-ftp.hmpdacc.org/data/Illumina/buccal_mucosa/SRS018359.tar.bz2	784fe32a0b0628e289d9ce2c2331ce91	1086453343
SRS052988	right_retroauricular_crease	ftp://public-ftp.hmpdacc.org/data/Illumina/right_retroauricular_crease/SRS052988.tar.bz2	9dfe56d9005d88efa1f9c452d667c5e7	1117577026
SRS015381	right_retroauricular_crease	ftp://public-ftp.hmpdacc.org/data/Illumina/right_retroauricular_crease/SRS015381.tar.bz2	d67604da7be24fe132e36cfe372ed32a	1125244822
SRS052874	buccal_mucosa	ftp://public-ftp.hmpdacc.org/data/Illumina/buccal_mucosa/SRS052874.tar.bz2	cff3e743a15ff0aa880a1345fb57adae	1150556735
SRS046688	right_retroauricular_crease	ftp://public-ftp.hmpdacc.org/data/Illumina/right_retroauricular_crease/SRS046688.tar.bz2	0c057651f6fdc022d473df8aae75311c	1163006142
SRS019129	subgingival_plaque	ftp://public-ftp.hmpdacc.org/data/Illumina/subgingival_plaque/SRS019129.tar.bz2	6cae06249b1888e3ec3d12d29d731aa0	1184759385
SRS015646	buccal_mucosa	ftp://public-ftp.hmpdacc.org/data/Illumina/buccal_mucosa/SRS015646.tar.bz2	6142bedc0c9b7b03c685282af53f9172	1185179767
SRS023987	buccal_mucosa	ftp://public-ftp.hmpdacc.org/data/Illumina/buccal_mucosa/SRS023987.tar.bz2	84a3cb631bec57923e555fe9ad48d331	1215927949
SRS045313	supragingival_plaque	ftp://public-ftp.hmpdacc.org/data/Illumina/supragingival_plaque/SRS045313.tar.bz2	e510f933fda8e09d540a9bf8bef0354f	1238455168
SRS019064	right_retroauricular_crease	ftp://public-ftp.hmpdacc.org/data/Illumina/right_retroauricular_crease/SRS019064.tar.bz2	5d9a61a229b6e95d6286e75e8b25c876	1266269195
SRS045262	buccal_mucosa	ftp://public-ftp.hmpdacc.org/data/Illumina/buccal_mucosa/SRS045262.tar.bz2	fb5a67d924954d5c6798e95d0a1f42e8	1269722409
SRS052604	supragingival_plaque	ftp://public-ftp.hmpdacc.org/data/Illumina/supragingival_plaque/SRS052604.tar.bz2	5be0f8527855b1c077f2ec348044daf8	1380930063
SRS015755	supragingival_plaque	ftp://public-ftp.hmpdacc.org/data/Illumina/supragingival_plaque/SRS015755.tar.bz2	1ddaac0ce2d0103368bcef3821eeb95f	1427058883
SRS011310	buccal_mucosa	ftp://public-ftp.hmpdacc.org/data/Illumina/buccal_mucosa/SRS011310.tar.bz2	405c0e4bfddbb44071084e22e3aa6c36	1434647151
SRS013506	buccal_mucosa	ftp://public-ftp.hmpdacc.org/data/Illumina/buccal_mucosa/SRS013506.tar.bz2	1c0bdf458fe597b36dd770fe3d13d4d5	1465158100
SRS014689	throat	ftp://public-ftp.hmpdacc.org/data/Illumina/throat/SRS014689.tar.bz2	fd6b84c170ca20795b52899aa4771c2a	1470752520
SRS064645	stool	ftp://public-ftp.hmpdacc.org/data/Illumina/stool/SRS064645.tar.bz2	ce1a93a65c1596d7d21d244ed4a28074	1471794270
SRS018778	supragingival_plaque	ftp://public-ftp.hmpdacc.org/data/Illumina/supragingival_plaque/SRS018778.tar.bz2	a8398471415aa9380d306e9a82f301be	1489086412
SRS063287	buccal_mucosa	ftp://public-ftp.hmpdacc.org/data/Illumina/buccal_mucosa/SRS063287.tar.bz2	231f7c7d92adf31d0b1dc535d28a8774	1502784852
SRS058221	right_retroauricular_crease	ftp://public-ftp.hmpdacc.org/data/Illumina/right_retroauricular_crease/SRS058221.tar.bz2	6cef1b2343eaf6d7936177be8184b0dd	1504159899
SRS056892	buccal_mucosa	ftp://public-ftp.hmpdacc.org/data/Illumina/buccal_mucosa/SRS056892.tar.bz2	54ed9c239337d0082884dc74b1062f43	1526631487
SRS015436	buccal_mucosa	ftp://public-ftp.hmpdacc.org/data/Illumina/buccal_mucosa/SRS015436.tar.bz2	7157262c7981200ad2d57e26693bf830	1548894002
SRS013258	left_retroauricular_crease	ftp://public-ftp.hmpdacc.org/data/Illumina/left_retroauricular_crease/SRS013258.tar.bz2	a56827ec36c7f7273f7219d4d54a196a	1550446872
SRS050628	buccal_mucosa	ftp://public-ftp.hmpdacc.org/data/Illumina/buccal_mucosa/SRS050628.tar.bz2	7f6a3b78dcea8bf8b4b1e4ba81ef43f8	1556971104
SRS051378	supragingival_plaque	ftp://public-ftp.hmpdacc.org/data/Illumina/supragingival_plaque/SRS051378.tar.bz2	224190c5bf259e569219bfebbba86539	1559654089
SRS050029	buccal_mucosa	ftp://public-ftp.hmpdacc.org/data/Illumina/buccal_mucosa/SRS050029.tar.bz2	b4d62653a1e426c2cca9dd50c1ec9464	1597013079
SRS058105	buccal_mucosa	ftp://public-ftp.hmpdacc.org/data/Illumina/buccal_mucosa/SRS058105.tar.bz2	32f5b9e3786e70c623ec663095729c38	1597105423
SRS019333	supragingival_plaque	ftp://public-ftp.hmpdacc.org/data/Illumina/supragingival_plaque/SRS019333.tar.bz2	2f06c1f883be4f9ab871fa6d35bfa892	1654702420
SRS019587	buccal_mucosa	ftp://public-ftp.hmpdacc.org/data/Illumina/buccal_mucosa/SRS019587.tar.bz2	f997596209df58c119d55e057c361165	1662452218
SRS017013	buccal_mucosa	ftp://public-ftp.hmpdacc.org/data/Illumina/buccal_mucosa/SRS017013.tar.bz2	03e2433bd09f9decbb71461226931579	1678651407
SRS045606	right_retroauricular_crease	ftp://public-ftp.hmpdacc.org/data/Illumina/right_retroauricular_crease/SRS045606.tar.bz2	6249882a442ff54067bb19e7ccc9239d	1682424814
SRS022625	buccal_mucosa	ftp://public-ftp.hmpdacc.org/data/Illumina/buccal_mucosa/SRS022625.tar.bz2	761eac81f6d7db0908c615f120b8fb49	1714046653
SRS043676	buccal_mucosa	ftp://public-ftp.hmpdacc.org/data/Illumina/buccal_mucosa/SRS043676.tar.bz2	48962e5fd0f95722ee05a1c861eefe8c	1724582664
SRS063215	subgingival_plaque	ftp://public-ftp.hmpdacc.org/data/Illumina/subgingival_plaque/SRS063215.tar.bz2	957c4c8e33a39057d51985fd0807a41f	1740933476
SRS011247	buccal_mucosa	ftp://public-ftp.hmpdacc.org/data/Illumina/buccal_mucosa/SRS011247.tar.bz2	78a6db8899e74fc4de08afbffbe5a6a1	1742396548
SRS018329	buccal_mucosa	ftp://public-ftp.hmpdacc.org/data/Illumina/buccal_mucosa/SRS018329.tar.bz2	2e37722e4b2b7057f03d09c49d5b4281	1754273457
SRS054569	buccal_mucosa	ftp://public-ftp.hmpdacc.org/data/Illumina/buccal_mucosa/SRS054569.tar.bz2	e7c63f948e3af25795f34488cc8d3cdf	1760409564
SRS015378	supragingival_plaque	ftp://public-ftp.hmpdacc.org/data/Illumina/supragingival_plaque/SRS015378.tar.bz2	2997e84f30a80fa02b3c7c1a86cf82d0	1791342187
SRS019124	buccal_mucosa	ftp://public-ftp.hmpdacc.org/data/Illumina/buccal_mucosa/SRS019124.tar.bz2	9428d7706ac7af7bbec595d8871d4af0	1795684950
SRS016203	stool	ftp://public-ftp.hmpdacc.org/data/Illumina/stool/SRS016203.tar.bz2	2333ea5706de8b2c2d439f9b20f8dd8d	1798861134
SRS019026	palatine_tonsils	ftp://public-ftp.hmpdacc.org/data/Illumina/palatine_tonsils/SRS019026.tar.bz2	995f97158cc50a9909374582996b3454	1869625684
SRS021960	supragingival_plaque	ftp://public-ftp.hmpdacc.org/data/Illumina/supragingival_plaque/SRS021960.tar.bz2	93b1c4f7390565147b343865077bd80e	1870703799
SRS014691	subgingival_plaque	ftp://public-ftp.hmpdacc.org/data/Illumina/subgingival_plaque/SRS014691.tar.bz2	a619496d6099e0d13d546417be6ce083	1875764168
SRS019027	throat	ftp://public-ftp.hmpdacc.org/data/Illumina/throat/SRS019027.tar.bz2	eeee1b1361e7ff54765ec12da0f355c6	1890759330
SRS013950	subgingival_plaque	ftp://public-ftp.hmpdacc.org/data/Illumina/subgingival_plaque/SRS013950.tar.bz2	9f66ffc4fbd1abb0e9ec82be6e97855d	1907044343
SRS062540	tongue_dorsum	ftp://public-ftp.hmpdacc.org/data/Illumina/tongue_dorsum/SRS062540.tar.bz2	f14bbf5a01462f5570fb24c593489d65	1957219605
SRS022149	supragingival_plaque	ftp://public-ftp.hmpdacc.org/data/Illumina/supragingival_plaque/SRS022149.tar.bz2	f674f3a771fc93e9d6830a8f5a752a9d	1969288071
SRS024144	supragingival_plaque	ftp://public-ftp.hmpdacc.org/data/Illumina/supragingival_plaque/SRS024144.tar.bz2	d572d5f93bf1eb16ece306c29db564c9	1975723870
SRS013945	buccal_mucosa	ftp://public-ftp.hmpdacc.org/data/Illumina/buccal_mucosa/SRS013945.tar.bz2	72df171a481e84dc401ba357bb2bce4d	2006042200
SRS013947	palatine_tonsils	ftp://public-ftp.hmpdacc.org/data/Illumina/palatine_tonsils/SRS013947.tar.bz2	fa69ae22d30716a84b70cc6def33ec02	2008200347
